# Supplementary material for: Imbalance between subpopulations of regulatory T cells in COPD
Source: HighWire-hosted journal article supplement (doi:10.1136/thoraxjnl-2012-201956), 2013-06-07
Supplement: thoraxjnl-2012-201956supp_appendix.pdf [file thoraxjnl-2012-201956supp_appendix.pdf]

## **Supplementary Appendix**

### **Flow cytometry and cell count**

Treg subpopulations were gated as shown in supplementary figure 1. These settings were applied for subsequent CD4<sup>+</sup> T cells analysis of 100,000 events. CD4<sup>+</sup> T-cell count was determined using a standard flow cytometry technique with a TruCOUNT tube (BD Biosciences). The absolute numbers of each subpopulation were calculated based on CD4<sup>+</sup> T-cell counts and their frequencies. Data acquired by FACS-Calibur (BD Biosciences) were analysed using FlowJo software (Tree Star, Ashland, OR, USA).

Cells for FoxP3 and cytotoxic T lymphocyte antigen (CTLA)-4 staining were prepared for intracellular flow cytometry with a “Fix and Perm” kit (e-Bioscience) following the manufacturer’s instructions. After permeabilisation and washing, cells were labelled with anti-Foxp3-PE (e-Bioscience) and anti-CTLA-4-APC (e-Bioscience). Corresponding isotype controls were used as staining controls (BD Biosciences and e-Bioscience). Intracellular cytokine elaborations were determined in PBMC sand stimulated for 5 h with phorbol myristate acetate (PMA; 5 ng/ml) and calcium ionomycin (500 ng/ml) in the presence of GolgiStop. Cells were fixed, permeabilised, and stained with Anti-hIFN- $\gamma$ -FITC (BD Biosciences) and anti-hIL-17A-Percp-cy5.5 (BD Biosciences).

### **Cell culture and *in vitro* suppression assay**

For *in vitro* suppression assay of different Treg subsets, CD4<sup>+</sup>CD25<sup>-</sup> cells were purified by labelling with anti-human CD25-PE antibody (eBioscience) and anti-PE microbeads (Miltenyi Biotech, BergischGladbach, Germany) from healthy controls as responder cells. Carboxyfluorescein succinimidyl ester (CFSE)-labelled CD4<sup>+</sup>CD25<sup>-</sup> responder cells ( $5 \times 10^4$ ) were cocultured with  $1 \times 10^4$  unlabelled FrI (CD25<sup>++</sup>CD45RA<sup>+</sup>,

rTreg), FrII(CD25<sup>+++</sup>CD45RA<sup>-</sup>, aTreg) or Fr III (CD25<sup>++</sup>CD45RA<sup>-</sup>) cells, respectively, in anti-CD3 (5 g/ml, OKT3 mAb; eBioscience) coated plates in the presence of soluble anti-CD28 (5 µg/ml; eBioscience) for 72–96 h. Proliferation of CFSE-labelled cells was assessed by flow cytometry and the percentage suppression was determined based on the percentage of dividing of CFSE-labelled cells as compared with the percentage of dividing CFSE-labelled cells when cultured alone.
