# Supplementary material for: Imbalance between subpopulations of regulatory T cells in COPD
Source: HighWire-hosted journal article supplement (doi:10.1136/thoraxjnl-2012-201956), 2013-06-07

**Supplementary figure 1.** Representative plots of flow cytometry used in BAL (A) and PBMC (B) analysis.

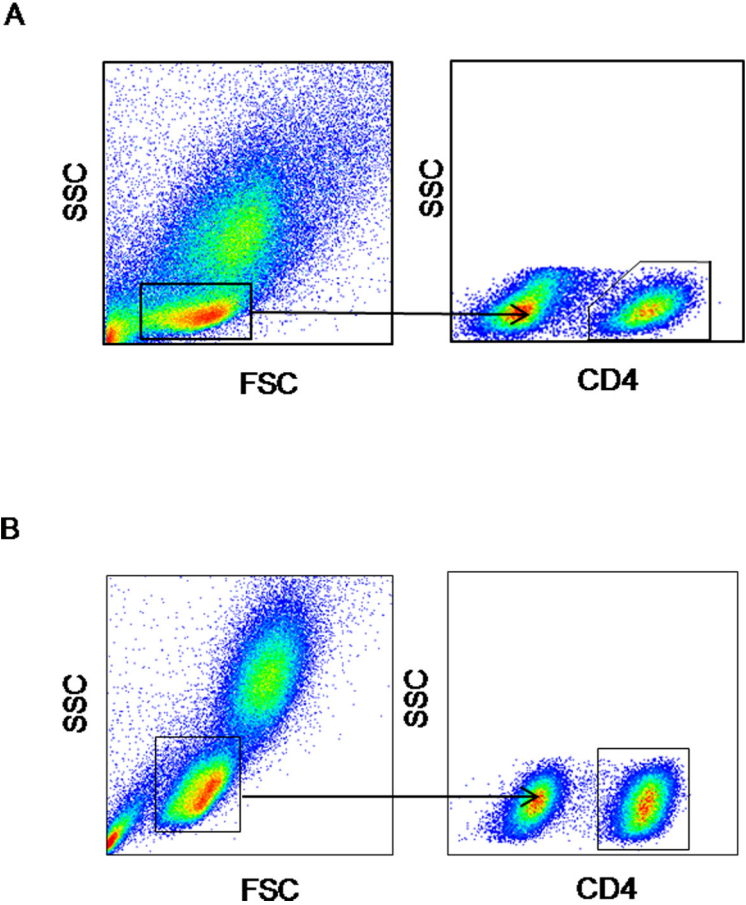

**Supplementary figure 2.** The effect of corticosteroid on subpopulations of Foxp3<sup>+</sup> T cells in COPD patients. The cross-sectional analysis showed that no difference was found between patients receiving and not receiving inhaled corticosteroid in terms of three subpopulations of Tregs. Horizontal lines indicate median values.

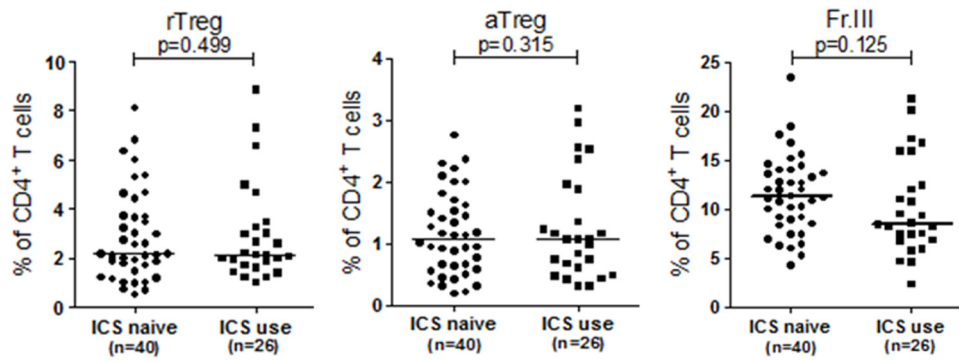

Supplement: thoraxjnl-2012-201956supp_figures.pdf [file thoraxjnl-2012-201956supp_figures.pdf]
